# Supplementary material
Source: MDPI journal article supplement (https://www.mdpi.com/2073-445X/13/4/440)
Supplement: s1 [file s1]

**Table S1. Land use transfer matrix in YRD region during 2000-2005 (km<sup>2</sup>)**

| 2000-2005                 | Cultivated land | Forest    | Grass land | Water area | Built-up area | Unused land | Original area |
|---------------------------|-----------------|-----------|------------|------------|---------------|-------------|---------------|
| Cultivated land           | 178154.38       | 341.28    | 16.44      | 712.57     | 3642.68       | 0.89        | 182868.24     |
| Forest                    | 365.88          | 99716.79  | 117.92     | 56.38      | 235.76        | 3.36        | 100496.09     |
| Grassland                 | 59.73           | 134.48    | 11290.16   | 25.26      | 32.54         | 2.07        | 11544.24      |
| Water area                | 316.03          | 20.75     | 17.3       | 23747.02   | 100.69        | 0.08        | 24201.87      |
| Built-up area             | 181.29          | 13.76     | 1.15       | 18.37      | 30823.46      | 0.02        | 31038.05      |
| Unused land               | 0.13            | 2.11      | 1.65       | 1.54       | 2.8           | 55.11       | 63.34         |
| Area after transformation | 179077.44       | 100229.17 | 11444.62   | 24561.14   | 34837.93      | 61.53       | -             |

**Table S2. Land use transfer matrix in YRD region during 2005-2010 (km<sup>2</sup>)**

| 2005-2010                 | Cultivated land | Forest   | Grass land | Water area | Built-up area | Unused land | Original area |
|---------------------------|-----------------|----------|------------|------------|---------------|-------------|---------------|
| Cultivated land           | 156708.56       | 5148.04  | 554.2      | 2510.27    | 14080.55      | 66.14       | 179067.76     |
| Forest                    | 5313.8          | 92641.94 | 1179.76    | 339.23     | 694.63        | 46.5        | 100215.86     |
| Grassland                 | 570.94          | 1170.67  | 9211.5     | 310.61     | 135.15        | 44.38       | 11443.25      |
| Water area                | 1917.6          | 263.07   | 98.41      | 21740.55   | 524.62        | 1.81        | 24546.06      |
| Built-up area             | 7411.68         | 310.36   | 67.18      | 454.86     | 26551.89      | 37.57       | 34833.54      |
| Unused land               | 2.48            | 14.67    | 1.33       | 0.88       | 2.92          | 39.21       | 61.49         |
| Area after transformation | 171925.06       | 99548.75 | 11112.38   | 25356.4    | 41989.76      | 235.61      | -             |

**Table S3. Land use transfer matrix in YRD region during 2010-2015 (km<sup>2</sup>)**

| 2010-2015                 | Cultivated land | Forest   | Grass land | Water area | Built-up area | Unused land | Original area |
|---------------------------|-----------------|----------|------------|------------|---------------|-------------|---------------|
| Cultivated land           | 166307.54       | 214.55   | 12.85      | 738.87     | 4647.53       | 14.27       | 171935.61     |
| Forest                    | 68.1            | 99151.12 | 4.25       | 25.72      | 301.26        | 6.94        | 99557.39      |
| Grassland                 | 23.42           | 13.52    | 10971.21   | 23.81      | 80            | 2.92        | 11114.88      |
| Water area                | 287.2           | 1.4      | 54.09      | 24824.46   | 210.35        | 1.18        | 25378.68      |
| Built-up area             | 493.17          | 32.76    | 12.87      | 153.17     | 41298.11      | 8.59        | 41998.67      |
| Unused land               | 9.12            | 0        | 0          | 1.15       | 14.4          | 211.02      | 235.69        |
| Area after transformation | 167188.55       | 99413.35 | 11055.27   | 25767.18   | 46551.65      | 244.92      | -             |

**Table S4. Land use transfer matrix in YRD region during 2015-2018 (km<sup>2</sup>)**

| 2015-2018                    | Cultivated<br>land | Forest   | Grass<br>land | Water<br>area | Built-up<br>area | Unused<br>land | Original<br>area |
|------------------------------|--------------------|----------|---------------|---------------|------------------|----------------|------------------|
| Cultivated land              | 160390.41          | 1242.64  | 215.46        | 950.01        | 4386.96          | 12.7           | 167198.18        |
| Forest                       | 1360.77            | 97097.85 | 344.95        | 85.72         | 495.3            | 4.92           | 99389.51         |
| Grassland                    | 230.98             | 282.85   | 10355.84      | 111.25        | 71.77            | 0.92           | 11053.61         |
| Water area                   | 1347.84            | 90.9     | 248.1         | 23902.02      | 296.42           | 185.45         | 26070.73         |
| Built-up area                | 3642.77            | 198.67   | 109.25        | 653.04        | 42022.95         | 6.17           | 46632.85         |
| Unused land                  | 60.48              | 5.55     | 23.55         | 14.23         | 29.12            | 111.99         | 244.92           |
| Area after<br>transformation | 167033.25          | 98918.46 | 11297.15      | 25716.27      | 47302.52         | 322.15         | -                |
